# Supplementary material for: Comparison of female rat reproductive effects of pubertal versus adult exposure to known endocrine disruptors
Source: Frontiers journal article supplement (doi:10.3389/fendo.2023.1126485), 2023-10-03
Supplement: Data_Sheet_1.pdf [file Data_Sheet_1.pdf]

## *Supplementary Material*

### **Comparison of female rat reproductive effects of pubertal *versus* adult exposure to known endocrine disruptors**

Julie Boberg, Tianyi Li, Sofie Christiansen, Monica K. Draskau, Pauliina Damdimopoulou, Terje Svingen and Hanna K.L. Johansson

**Supplementary Table 1.** Follicle categories used in quantification.

| Category                     | Area min (mm <sup>2</sup> ) | Area max (mm <sup>2</sup> ) |
|------------------------------|-----------------------------|-----------------------------|
| Small Follicle (SF)          | -                           | 0.06                        |
| Growing Antral Follicle (GA) | 0.06                        | 0.26                        |
| Pre-ovulatory Follicle (PO)  | 0.26                        | 1.76                        |
| Corpus Luteum (CL)           | -                           | -                           |

|   |     |     |     |     |     |     |     |      |      |     |     |     |     |
|---|-----|-----|-----|-----|-----|-----|-----|------|------|-----|-----|-----|-----|
| 1 | M   | D   | P   | Ø   | ØM  | MD  | D   | P    | Ø    | M   | D   |     |     |
| 1 | M   | M   | D   | P   | Ø   | Ø   | M   | MD   | D    | P   | Ø   | M   | D   |
| 1 | MD  | DP  | P   | Ø   | MT  | D   | P   | Ø    | MD   | D   |     |     |     |
| 1 | M   | D   | P   | Ø   | M   | T   | D   | P    | Ø    | M   | M   | D   | -   |
| 1 | DS  | PØ  | ØM  | MD  | D   | P   | Ø   | M    | D    | D   | P   | ØM  | MDT |
| 1 | DP  | PØ  | Ø   | M   | D   | P   | Ø   | M    | D    | P   | Ø   | M   | D   |
| 1 | PØ  | Ø   | MD  | D   | PT  | PØS | Ø   | M    | MD   | DP  | Ø   | ØM  | DP  |
| 1 | DPØ | ØTT | ØM  | MDT | D   | P   | ØT  | ØM   | MD   | D   | P   | Ø   | MDT |
| 1 | Ø   | M   | MD  | DP  | PØ  | Ø   | MD  | MD   | P    | Ø   | Ø   | M   | D   |
| 1 | ØT  | ØT  | Ø   | D   | D   | PS  | Ø   | M    | MD   | D   | P   | Ø   | MT  |
| 1 | Ø   | MT  | D   | PS  | PTT | PØ  | Ø   | ØM   | ØMT  | D   | P   | -   | -   |
| 1 | S   | S   | S   | S   | T   | T   | T   | S    | PØ   | MD  | -   | -   | -   |
| 2 | M   | DS  | P   | Ø   | MD  | D   | DP  | PØT  | Ø    | M   | D   | DPT |     |
| 2 | M   | D   | P   | Ø   | ØM  | MT  | D   | DPT  | PØ   | Ø   | M   | MD  | D   |
| 2 | D   | P   | Ø   | M   | MD  | DS  | P   | Ø    | M    | D   |     |     |     |
| 2 | MD  | DP  | Ø   | ØM  | M   | D   | D   | P    | Ø    | Ø   | MD  | MD  |     |
| 2 | MD  | MD  | MD  | S   | D   | ØTT | MT  | D    | D    | D   | -   | -   | -   |
| 2 | P   | Ø   | MD  | MD  | S   | S   | S   | PS   | ØS   | MS  | DS  | PS  |     |
| 2 | PT  | PØ  | Ø   | MD  | D   | D   | D   | P    | Ø    | Ø   | M   | D   |     |
| 2 | PT  | PØ  | ØMT | MDT | D   | D   | PØ  | ØM   | D    | D   | -   | -   | -   |
| 2 | PT  | Ø   | M   | MD  | DPT | DPT | P   | Ø    | MT   | D   | DPT | -   | -   |
| 2 | ØM  | M   | MD  | D   | DS  | P   | ØT  | MT   | D    | DPT | Ø   | M   | MDT |
| 2 | ØT  | MT  | MD  | D   | P   | Ø   | M   | D    | P    | Ø   | M   | D   | -   |
| 2 | Ø   | ØM  | MT  | D   | D   | DS  | S   | S    | S    | S   | S   | -   | -   |
| 3 | M   | D   | P   | MT  | PT  | Ø   | Ø   | M    | D    | P   | PØT |     |     |
| 3 | MTT | DPT | PØT | M   | D   | PØ  | ØM  | MD   | MDT  | DPT |     |     |     |
| 3 | P   | Ø   | MDT | Ø   | ØT  | ØMT | MDT | DPT  | PT   | PØ  | ØT  | MT  |     |
| 3 | P   | P   | P   | ØMT | MD  | P   | ØMT | ØMT  | M    | P   | Ø   | M   | MD  |
| 3 | PØ  | Ø   | Ø   | ØT  | ØM  | MT  | PØT | MD   | D    | -   | -   | -   |     |
| 3 | ØTT | MD  | MD  | S   | PS  | ØT  | MT  | D    | PS   | P   | PØ  | ØM  | D   |
| 3 | ØT  | ØTT | ØTT | ØTT | PØ  | ØM  | M   | MD   | P    | Ø   | M   | D   |     |
| 3 | ØT  | ØM  | ØM  | ØMT | MT  | DP  | DPT | DPT  | ØT   | MT  | -   | -   | -   |
| 3 | ØT  | Ø   | ØT  | ØT  | ØT  | ØMT | PTT | ØMT  | MDT  | PTT | Ø   | MDT | PT  |
| 3 | Ø   | PT  | Ø   | Ø   | Ø   | Ø   | MT  | M    | D    | S   | S   | P   | MD  |
| 3 | Ø   | Ø   | Ø   | Ø   | MPØ | Ø   | Ø   | MØP? | Ø    | Ø   | ØMT | P   | -   |
| 3 | Ø   | Ø   | Ø   | ØMT | DPT | P   | PØT | MD   | DPT  | DPT | -   | -   | -   |
| 4 | P   | Ø   | Ø   | Ø   | ØMD | PØ  | MD  | Ø    | Ø    | Ø   | Ø   | M   |     |
| 4 | PØT | PØT | PØT | ØMD | PØT | ØT  | ØMT | MT   | PØT  | MDT | -   | -   | -   |
| 4 | Ø   | Ø   | ØM  | Ø   | Ø   | PØ  | Ø   | Ø    | Ø    | Ø   | Ø   | Ø   |     |
| 4 | Ø   | Ø   | Ø   | Ø   | Ø   | PØ  | Ø   | Ø    | Ø    | Ø   | Ø   | Ø   |     |
| 4 | Ø   | Ø   | Ø   | Ø   | Ø   | PØ  | Ø   | Ø    | Ø    | PØ  | M   |     |     |
| 4 | Ø   | Ø   | Ø   | Ø   | ØM  | P   | Ø   | Ø    | Ø    | Ø   | Ø   |     |     |
| 4 | Ø   | PØ  | P   | Ø   | Ø   | Ø   | Ø   | Ø    | Ø    | Ø   | Ø   |     |     |
| 4 | ØT  | Ø   | Ø   | Ø   | M   | DPT | PØT | MDT  | T    | PT  | -   | -   | -   |
| 4 | ØTT | ØMT | ØT  | Ø   | Ø   | Ø   | Ø   | ØM   | PØTT | Ø   | Ø   | Ø   | ØT  |
| 4 | MØT | PØT | PØT | Ø   | MT  | DPT | PT  | PØT  | Ø    | Ø   | ØMT | P   | -   |
| 4 | Ø   | Ø   | Ø   | Ø   | Ø   | Ø   | Ø   | ØM   | DP   | ØT  | Ø   | M   | PØ  |
| 4 | Ø   | Ø   | Ø   | Ø   | Ø   | Ø   | Ø   | PØ   | ØM   | Ø   | MP  | MD  | -   |

**Supplementary Figure 1. Pubertal exposure.** Estrous cycle data for individual rats exposed to DES or vehicle for 28 days starting PND 23. Group 1 corresponds to control, group 2 to DES-0.003, group 3 to DES-0.012 and group 4 to DES-0.048.

|   | 70   | 71   | 72  | 73  | 74  | 75   | 76   | 77   | 78   | 79   | 80   | 81   | 82   | 83  | 84   | 85   | 86    | 87    | 88    | 89   | 90   | 91    | 92  | 93  | 94  |
|---|------|------|-----|-----|-----|------|------|------|------|------|------|------|------|-----|------|------|-------|-------|-------|------|------|-------|-----|-----|-----|
| 1 | D    | DS   | P   | Ø   | M   | D    | S    | S    | S    | D    | S    | SØ   | SM   | SD  | SP   | ØT   | M     | P     | PØT   | PØT  | Ø    | Ø     | M   | D   |     |
| 1 | M    | D    | P   | Ø   | ØM  | M    | M    | D    | PT   | P    | Ø    | ØM   | MT   | D   | P    | Ø    | M     | D     | P     | P    | Ø    | M     | MD  |     |     |
| 1 | D    | P    | Ø   | ØM  | M   | D    | P    | Ø    | ØM   | MT   | D    | P    | Ø    | ØM  | M    | PØ   | ØM    | D     | P     | T    | ØM   | P     |     |     |     |
| 1 | D    | PØ   | ØM  | MT  | DP  | PØ   | Ø    | MT   | MD   | P    | Ø    | M    | D    | P   | Ø    | MD   | M     | D     | P     | Ø    | M    | D     |     |     |     |
| 1 | SP   | PØ   | M   | D   | PT  | ØS   | MT   | MDS  | S    | S    | T    | ST   | S    | P   | ØM   | MDT  | DPT   | PØ    | ØM    | PS   | MS   | MS    | PS  | PS  | ØM  |
| 1 | P    | Ø    | M   | MD  | D   | P    | Ø    | MT   | D    | P    | Ø    | MD   | D    | P   | Ø    | M    | D     | P     | MD    | M    | D    | P     | Ø   | M   | D   |
| 1 | Ø    | M    | D   | P   | Ø   | MT   | D    | PØ   | Ø    | ØM   | M    | D    | P    | PØ  | ØM   | D    | P     | Ø     | M     | D    | P    | Ø     | MD  | DP  |     |
| 1 | ØS   | MT   | MD  | D   | P   | PØT  | MT   | D    | PØ   | ØM   | MT   | D    | PT   | PØ  | MD   | D    | PØ    | PØ    | M     | D    | Ø    | Ø     | MDT | MDT |     |
| 1 | Ø    | M    | D   | D   | S   | S    | DS   | S    | ØS   | S    | S    | S    | S    | S   | S    | ØST  | M     | MD    | D     | P    | Ø    | MT    | D   |     |     |
| 1 | ØM   | MT   | D   | Ø   | Ø   | MD   | MD   | D    | P    | Ø    | MT   | D    | P    | Ø   | M    | MDT  | D     | PS    | Ø     | M    | MD   |       |     |     |     |
| 1 | Ø    | ØM   | MT  | MT  | PT  | Ø    | M    | MD   | D    | P    | Ø    | MT   | D    | P   | Ø    | D    | D     | P     | Ø     | M    | D    | PØT   |     |     |     |
| 1 | S    | S    | S   | MS  | S   | PS   | ØS   | MDT  | PØ   | M    | D    | PS   | S    | S   | S    | PT   | S     | S     | S     | PS   | ØM   | PT    |     |     |     |
|   |      |      |     |     |     |      |      |      |      |      |      |      |      |     |      |      |       |       |       |      |      |       |     |     |     |
| 2 | MD   | D    | PTT | Ø   | ØM  | DPT  | PT   | ØTT  | Ø    | ØTT  | M    | P    | P    | M   | DPT  | Ø    | Ø     | MT    | D     | PTT  | Ø    | Ø     | M   |     |     |
| 2 | M    | D    | P   | Ø   | ØM  | MD   | D    | PS   | Ø    | Ø    | M    | D    | P    | ØT  | ØM   | M    | D     | PT    | Ø     | Ø    | M    | D     |     |     |     |
| 2 | D    | P    | Ø   | MT  | D   | ST   | P    | Ø    | MT   | D    | DP   | P    | ØT   | MT  | D    | PS   | PØ    | Ø     | M     | MD   | DS   | S     | ST  | Ø   | MT  |
| 2 | DS   | P    | Ø   | ST  | D   | S    | P    | ØST  | MT   | D    | PST  | ØS   | ØMS  | D   | DPT  | DPT  | P     | ØMST  | MT    | D    | ØTT  | Ø     | ØTT |     |     |
| 2 | PTT  | Ø    | Ø   | M   | MD  | D    | Ø    | Ø    | M    | D    | D    | Ø    | S    | P   | Ø    | M    | D     | PT    | Ø     | Ø    | ØM   | M     | D   |     |     |
| 2 | PØ   | ØMD  | MT  | D   | PS  | Ø    | ØM   | MDT  | MDT  | DS   | Ø    | M    | MD   | DS  | D    | P    | PØ    | M     | MD    | D    | PØ   | ØM    | D   |     |     |
| 2 | Ø    | M    | D   | DPT | PT  | ØS   | MT   | D    | PØ   | ØM   | D    | DPT  | PØT  | Ø   | M    | MT   | D     | PT    | Ø     | M    | MD   | D     | P   | Ø   | MT  |
| 2 | Ø    | ØMD  | MST | DT  | PT  | Ø    | ØM   | MTT  | D    | ST   | S    | S    | Ø    | M   | D    | P    | Ø     | M     | D     | P    | Ø    | MD    | DT  |     |     |
| 2 | S    | S    | S   | S   | S   | S    | S    | S    | S    | MT   | S    | S    | S    | S   | S    | DT   | PØ    | MD    | DS    | S    | P    | Ø     | MD  | D   |     |
| 2 | S    | P    | Ø   | MD  | PØ  | MT   | PØ   | Ø    | Ø    | ØM   | MT   | MT   | DPT  | PT  | S    | Ø    | ØM    | M     | D     | DS   | Ø    | Ø     | MT  | PØ  | M   |
| 2 | S    | P    | Ø   | M   | D   | P    | Ø    | Ø    | M    | MT   | D    | D    | Ø    | ØM  | M    | D    | PT    | Ø     | ØM    | MD   | DP   | P     | Ø   | MD  | DPT |
| 2 | T    | Ø    | M   | D   | D   | S    | PØ   | ØM   | MT   | DS   | P    | Ø    | MT   | MT  | D    | P    | Ø     | M     | M     | D    | PTT  | Ø     | ØM  | MDT | DT  |
|   |      |      |     |     |     |      |      |      |      |      |      |      |      |     |      |      |       |       |       |      |      |       |     |     |     |
| 3 | MT   | D    | ST  | ST  | PØ  | MT   | MT   | D    | P    | Ø    | M    | D    | T    | PØ  | M    | M    | D     | DP    | Ø     | ØMD  | MDT  | DT    | PTT | Ø   | MDT |
| 3 | ØMT  | MTT  | MT  | DPT | PT  | ØT   | M    | MD   | DPT  | PT   | Ø    | M    | DPT  | DPT | PØ   | ØT   | M     | M     | D     | P    | Ø    | ØM    | MT  |     |     |
| 3 | Ø    | MST  | D   | ST  | S   | ST   | PØ   | ØMS  | ØMT  | DS   | PØ   | PØ   | ØM   | MT  | ØMT  | MDS  | DPS   | ØT    | Ø     | Ø    | ØTT  | MTT   | MST | MST | DS  |
| 3 | ØMT  | MT   | DT  | ST  | PS  | PØST | ØMST | MTT  | S    | S    | PØ   | M    | MS   | MDS | DS   | PØS  | ØMST  | MT    | M     | MST  | S    | S     | ST  |     |     |
| 3 | Ø    | M    | D   | T   | PST | PS   | PØS  | ØM   | MT   | MDT  | DP   | PØ   | Ø    | M   | MD   | P    | P     | Ø     | ØT    | ØM   | MD   | T     | T   |     |     |
| 3 | S    | PØ   | MD  | T   | ST  | S    | S    | ØM   | MT   | MDT  | DPT  | ØTT  | ØMTT | MTT | MDT  | D    | PST   | ØS    | MT    | MDS  | PØTT | PØSTT | PØS | MT  | MDT |
| 3 | S    | P    | PØT | MT  | MDT | PT   | S    | PØ   | Ø    | ØM   | D    | MD   | S    | S   | SØ   | M    | P     | M     | MDT   | ØMDT | PST  | S     | S   |     |     |
| 3 | ØT   | Ø    | MT  | ØM  | PT  | PS   | Ø    | Ø    | M    | ØM   | M    | DP   | S    | S   | S    | S    | S     | S     | S     | S    | S    | S     | S   |     |     |
| 3 | ØMTT | ØMT  | MD  | PST | ØT  | MT   | MT   | D    | PØ   | ØMT  | MT   | MD   | DPT  | PØ  | ØMT  | ØMT  | ØMT   | D     | P     | Ø    | MT   | ØM    | D   |     |     |
| 3 | S    | ØM   | M   | MD  | D   | DP   | PØ   | ØMT  | MS   | ST   | PØ   | Ø    | M    | MD  | PØ   | Ø    | Ø     | Ø     | Ø     | MT   | ØMD  | PTT   | P   | PØ  |     |
| 3 | ST   | S    | ØT  | MTT | MTT | PØT  | MT   | ST   | PØS  | ØMT  | M    | DT   | T    | PST | ØMT  | MT   | MDT   | D     | PØ    | ØMT  | MTT  | D     |     |     |     |
| 3 | S    | S    | ST  | S   | ST  | ST   | S    | S    | S    | DS   | D    | PØ   | M    | D   | S    | ØSTT | P     | ØM    | M     | D    | P    | S     | MS  | M   |     |
|   |      |      |     |     |     |      |      |      |      |      |      |      |      |     |      |      |       |       |       |      |      |       |     |     |     |
| 4 | MDS  | MDS  | DPT | PTT | PST | PST  | P    | ØTT  | ØMT  | ØMT  | MT   | PØT  | PØT  | ØMT | ØMT  | PØT  | PØT   | ØT    | ØT    | ØMT  | ØMT  | ØMT   |     |     |     |
| 4 | MD   | D    | S   | S   | S   | ST   | S    | S    | S    | S    | ST   | S    | S    | ØMS | MS   | MS   | S     | MST   | MST   | PST  | PST  | DPS   | PS  | DPS |     |
| 4 | MD   | DPST | S   | S   | S   | S    | S    | S    | S    | ST   | ST   | MS   | ØMS  | ØMS | ØMS  | ØMS  | PØS   | Ø     | ØM    | ØT   | ØST  | MT    | Ø   | ØM  |     |
| 4 | MT   | PST  | S   | S   | S   | ST   | ST   | S    | S    | S    | S    | S    | T    | S   | PSTT | PSTT | PØMST | S     | PØMST | PØMS | S    | PST   | ØTT | MTT |     |
| 4 | MD   | S    | S   | S   | S   | S    | S    | S    | S    | S    | S    | S    | S    | S   | PS   | ØMS  | ØMT   | ØMT   | DPT   | ØT   | Ø    | Ø     | Ø   | ØT  | Ø   |
| 4 | PT   | PS   | S   | ST  | S   | S    | S    | S    | S    | S    | T    | S    | S    | S   | S    | S    | S     | S     | S     | S    | S    | ST    | SPT | PS  | Ø   |
| 4 | PT   | S    | S   | S   | S   | S    | S    | S    | S    | ØMST | ØMST | PS   | STT  | ØM  | M    | MDT  | P     | Ø     | ØM    | Ø    | ØM   | ØM    | Ø   | ØMT |     |
| 4 | PT   | S    | S   | S   | S   | S    | S    | ØSTT | MS   | PITS | PSTT | ØMST | S    | S   | ST   | MSTT | ØSTT  | ØMSTT | PSTT  | Ø    | MST  | T     | T   | ST  |     |
| 4 | S    | PST  | ØST | MST | PST | S    | ØST  | S    | ST   | PS   | Ø    | Ø    | Ø    | Ø   | Ø    | Ø    | Ø     | Ø     | Ø     | Ø    | Ø    | Ø     | ØMT | MT  |     |
| 4 | S    | S    | S   | S   | S   | ST   | ST   | S    | S    | ST   | DT   | S    | S    | S   | S    | S    | S     | S     | ST    | PØT  | MST  | MST   |     |     |     |
| 4 | S    | S    | S   | S   | S   | S    | ØMST | S    | S    | ST   | ØMST | ØMS  | ØMST | S   | S    | STT  | STT   | ØMT   | MT    | PØS  | Ø    | ØST   |     |     |     |
| 4 | ST   | S    | S   | S   | S   | PS   | PØST | ØMST | ØMST | PØST | Ø    | ØT   | ØTT  | Ø   | Ø    | M    | ØT    | ØT    | Ø     | Ø    | ØTT  | ØT    | Ø   | ØTT |     |

**Supplementary Figure 2. Adult exposure.** Estrous cycle data for individual rats exposed to DES or vehicle for 28 days starting PND 63. Group 1 corresponds to control, group 2 to DES-0.003, group 3 to DES-0.012 and group 4 to DES-0.048.
